# Supplementary material
Source: Springer Nature journal article supplement (https://www.springermedizin.de/resource/supplementary/12936_2012_2234_MOESM1_ESM.pdf/9542674)

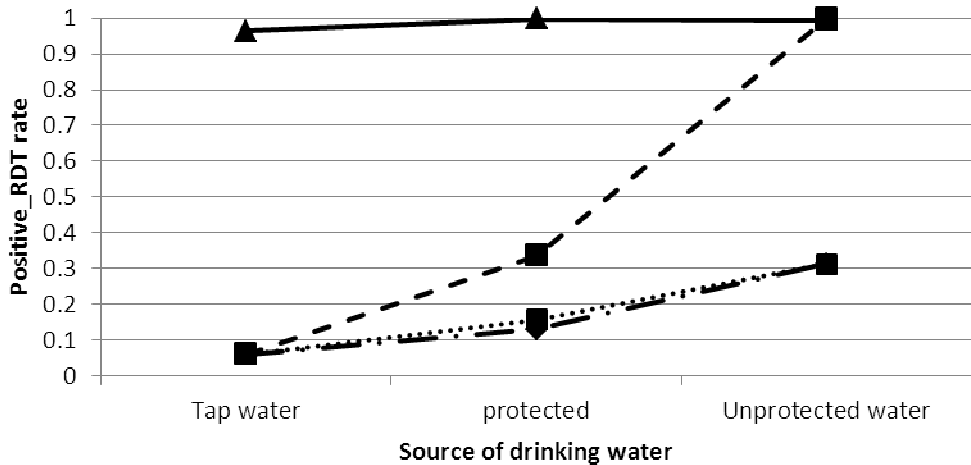

—◆— Male\_Yes    ...■... Male\_No    —▲— Female\_Yes    -■- Female\_No

Supplement: MOESM1 [file 9542674]
